# Supplementary material
Source: publisher site journal article supplement (https://www.dovepress.com/get_supplementary_file.php?f=385645.docx)
Supplement: Supplementary file 1 [file get_supplementary_file.php]

**Dupilumab efficacy in patients with uncontrolled moderate-to-severe type 2 asthma regardless of perennial aeroallergen sensitization**

Jonathan Corren; David J. Jackson; Thomas B. Casale; Larry Borish; Klaus F. Rabe; William W. Busse; Jorge F. Maspero; Daniel J. Jackson; Nadia Daizadeh; Arman Altincatal; Amr Radwan; Angela Khodzhayev; Michel Djandji; Juby A. Jacob-Nara; Paul J. Rowe; Yamo Deniz

# SUPPLEMENTARY INFORMATION

**Supplementary Section 1: List of participating investigators of the LIBERTY ASTHMA QUEST study by country**

**Argentina:** Hector Altieri, Rita Delgado Vizcarra, Maria De Salvo, Gabriel Garcia, Carlos Kofman, Adriana Marcipar, Walter Mattarucco, Dario Ramon German, Ana Maria Stok, Alberto Tolcachier, Anahi Yañez

**Australia:** Philip Bardin, Peter Bremner, Michael Chia, Jo Douglass, David Langton

**Brazil:** Martti Antila, Daniela Blanco, Clóvis Eduardo Galvão, Adelmir Machado, Marcio Neis, Andréia Pez, Emilio Pizzichini, Adalberto Rubin

**Canada:** Louis-Philippe Boulet, Kenneth Chapman, Jacques Hebert, Pierre-Alain Houle, William Killorn, Pierre Larivee, Jason Lee, Richard Leigh, Catherine Lemière, Ronald Olivenstein, Claude Poirier, William Yang

**Chile:** Manuel Barros, Mario Calvo, Juan Celis, Patricia Diaz, Rosa Feijoo, Roxana Fuentes, Laura Mendoza, Juana Paviè, Carlos Quilodran, Patricio Rioseco, Andres Rosenblut, Patricia Schonffeldt, Rafael Silva, Tamara Soler

**Colombia:** Mauricio Duran, Carlos Matiz Bueno

**France:** Arnaud Bourdin, Pascal Chanez, Frederic De Blay, Antoine Deschildre, Gilles Devouassoux, Stephanie Fry, Christophe Leroyer, Antoine Magnan, Camille Taillé, Angelica Tiotiu

**Germany:** Stephanie Korn, Juliane Kronsbein, Isabelle Schenkenberger, Olaf Schmidt

**Hungary:** Janos Mucsi

**Italy:** Leonardo Antonicelli, Bianca Beghé, Nunzio Crimi, Francesco Menzella, Pierluigi Paggiaro, Alberto Papi, Giovanni Rolla, Nicola Alessandro Scichilone

**Japan:** Tetsuya Adachi, Hitoshi Asamoto, Motohiro Ebisawa, Takao Fujisawa, Yasushi Fukushima, Kenichi Gemba, Michiko Haida, Masayuki Hayashi, Takahiko Horiguchi, Soichiro Hozawa, Ryotaro Igusa, Masayuki Iijima, Nobuhisa Ishikawa, Susumu Isogai, Shinyu Izumi, Mitsuhiro Kamimura, Takanori Kanematsu, Akira Kanezaki, Youichi Karimata, Motokazu Kato, Yasutaka Kawai, Tetsuya Kawano, Yuji Kawarada, Akira Kawasaki, Tomoo Kishaba, Reiko Kishikawa, Toshiyuki Kita, Hiroshi Kiyokawa, Yasuhiro Kondoh, Kei Masuda, Seijiro Minamoto, Fumiko Mori, Kiyotaka Nakajima, Yoichi Nakamura, Yuji Nakatani, Yoshihiro Nishimura, Hiroyuki Ohbayashi, Kazuhiko Oki, Hisashi Onishi, Hironori Sagara, Takefumi Saito, Osamu Sakamoto, Ken Sanno, Hiroyuki Sano, Yasuyuki Sano, Naruhiko Sugihara, Hisaho Takahashi, Toshiki Takahashi, Hiroshi Tanaka, Yasumasa Tanaka, Kazunori Tobino, Daisuke Uno, Hirotaka Yasuba, Yuji Yasuda

**Republic of Korea:** Yousook Cho, Byoung-Whui Choi, Sangheon Kim, Sang Haak Lee, Byungjae Lee, Choonsik Park, Heung-Woo Park, Haesim Park, Jung Won Park

**Mexico:** Sylvia Colmenero, Jesus Diaz, Marco Antonio Fernandez Corzo, Sandra González-Díaz, Dante Hernandez, Carlos Hernandez Barraza, Jesus Lujan, Rodolfo Posadas, Amado Ramirez Hernandez, Alicia Ramirez Rivera, Ricardo Ramirez Terrones, Mario Rosas

**Poland:** Andrzej Dymek, Grazyna Jasieniak-Pinis, Ewa Jassem, Piotr Kuna, Zenon Siergiejko, Ewa Springer, Iwona Stelmach, Joanna Waszkuc-Golonko

**Russian Federation:** Zaurbek Aisanov, Yury Antonovsky, Anton Edin, Alexander Emelyanov, Mikhail Goldin, Igor Leshchenko, Sergey Mikhailov, Natalia Nenasheva, Shamil Palyutin, Julia Popova, Natalia Shaporova, Irina Sidorenko, Vasiliy Trofimov

**South Africa:** Ismail Abdullah, Paul Abrahams, Elvis Irusen, Chantal Muller, Haylene Nell, Monja Nortje, Jonathan Peter, Michael Van der Linden, Richard Van Zyl-Smit

**Spain:** Francisco de Borja Garcia-Cosio Piqueras, Jose Echave-Sustaeta, Francisco-Javier GonzalezBarcala, Luis Lores Obradors, Eva Martinez Moragon, Xavier Muñoz, Antonio Luis Valero Santiago

**Taiwan:** Chi-Li Chung, Wu-Huei Hsu, Kang-Yun Lee

**Turkey:** Sibel Atis Nayci, Berna Dursun, Dane Ediger, Munevver Erdinc, Bilun Gemicioglu, Fusun Kalpaklioglu, Sait Karakurt, Ferda Oner Erkekol, Serir Ozkan

**Ukraine:** Serhiy Andreychyn, Viktor Blazhko, Oleksandr Dziublyk, Volodymyr Gavrysyuk, Liudmyla Iashyna, Svitlana Ilchenko, Igor Kaydashev, Vadym Klapoukh, Viktoriia Kostromina, Svitlana Kovalenko, Volodymyr Lapshyn, Yuriy Mostovoy, Svitlana Nedelska, Mykola Ostrovsky, Valentyn Polyakov, Nataliia Prymushko, Olena Rechkina, Oleksandr Smolianyi, Roman Yatsyshyn

**United Kingdom:** Anoop Chauhan, David Collier, Elizabeth Fuller, Dinesh Saralaya

**United States:** Oral Alpan, Francis Averill, James Baker, Jose Bardelas, Againdra Bewtra, Amy Boyd, William Byars, Jose Cardona, Warner Carr, Thomas Casale, Lee Clore, John Cohn, Lauren Cohn, Jeremy Cole, Timothy Craig, Bruce Decotiis, Joseph Diaz, Paul Dowling, Jacqueline Eghrari-Sabet, David Elkayam,

Bruce Finkel, Charles Fogarty, Stephen Fritz, David Fuentes, Alan Goldsobel, Greg Gottschlich, Richard Gower, Leon Greos, Gary Gross, Philip Halverson, Duane Harris, Richard Henry, Iftikhar Hussain, Neal Jain, Douglas Johnston, Neil Kao, Monroe Karetzky, Steven Kelsen, Edward Kent, Jr., Edward Kerwin, Ahtaram Khan, Ryan Klein, Joel Kline, Flory Kreutter, Kannappan Krishnaswamy, Shahrukh Kureishy, Jaime Landman, Bob Lanie, Njira Lugogo, Michael Manning, Lyndon Mansfield, Teri McQuaid, Steven Meltzer, David Miller, Timothy Mooring, Paul Norwood, Maeve O'Connor, Robert Onder, Michael Palumbo, David Pearlman, Andrew Pedinoff, Mercedes Pernice, Anju Peters, Dileep Puppala, George Pyrgos, John Ramey, Syed Rehman, Ileana Rodicio, Linda Rogers, Mark Scarupa, Paul Shapero, Ellen Sher, Vinay Sikand, Teresa Sligh, Andrew Smith, Weily Soong, Daniel Soteres, George Stewart, Tonny Tanus, Kelly Taylor, Jeffrey Tillinghast, Swapnil Vaidya, Manuel Villareal, Andrew Wachtel, Debra Weinstein, Hugh Windom, Zahid Zafar, John Zwetchkenbaum
